# Supplementary material for: Optimal targeting of BCL-family proteins in head and neck squamous cell carcinoma requires inhibition of both BCL-xL and MCL-1
Source: PubMed Central journal article supplement (PMC6355180; doi:10.18632/oncotarget.26563), 2019-01-11
Supplement: oncotarget-10-494-s001.pdf [file oncotarget-10-494-s001.pdf]

## Optimal targeting of BCL-family proteins in head and neck squamous cell carcinoma requires inhibition of both BCL-xL and MCL-1

### SUPPLEMENTARY MATERIALS

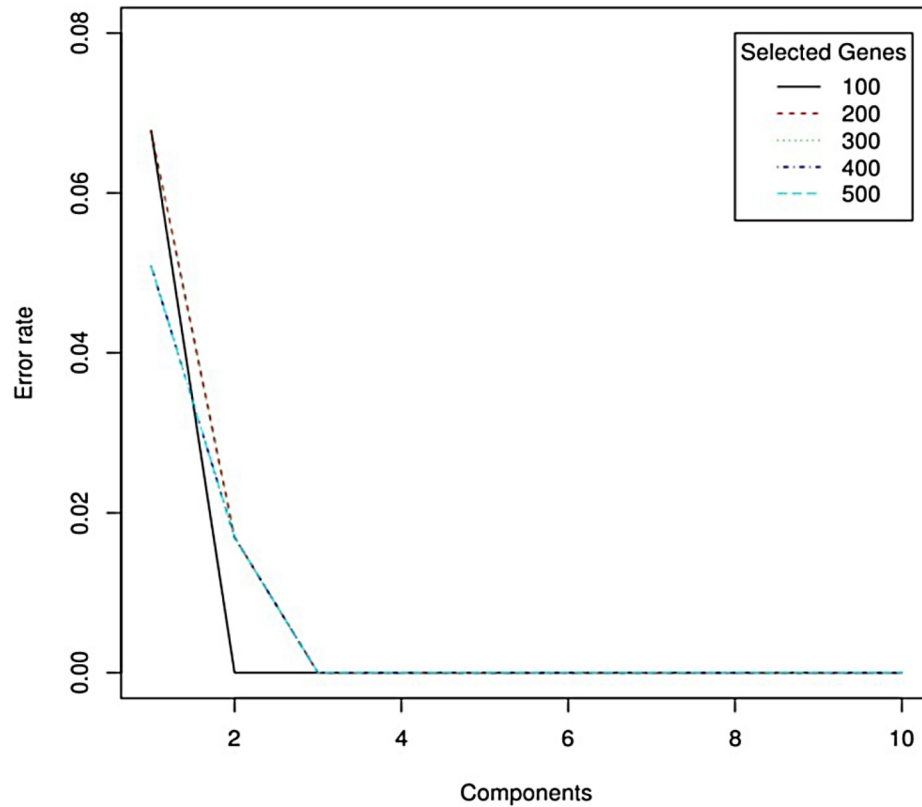

**Supplementary Figure 1: Crossvalidation plot demonstrating the predictive error of 2 component models using different numbers of selected features. 100 specific features optimizes the 2 component model.**

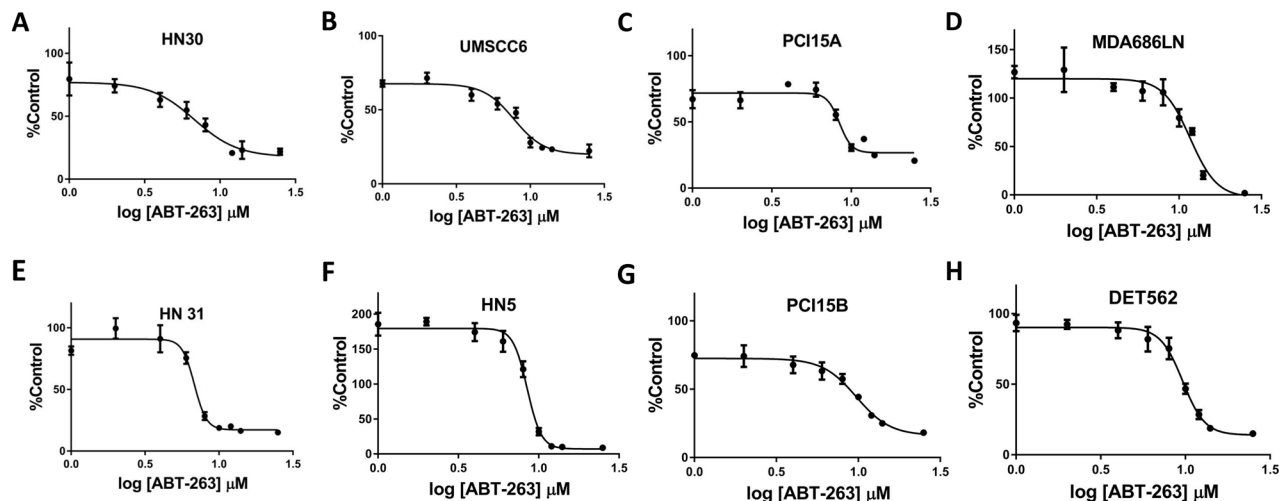

**Supplementary Figure 2: Representative results from MTT assays evaluating response of head and neck squamous cell cancer cell lines to ABT-263 (navitoclax).** ABT (navitoclax) for (A) HN30, (B) UMSCC6, (C) PCI15A, (D) MDA686LN, (E) HN31, (F) HN5, (G) PCI15B, and (H) Detroit562.

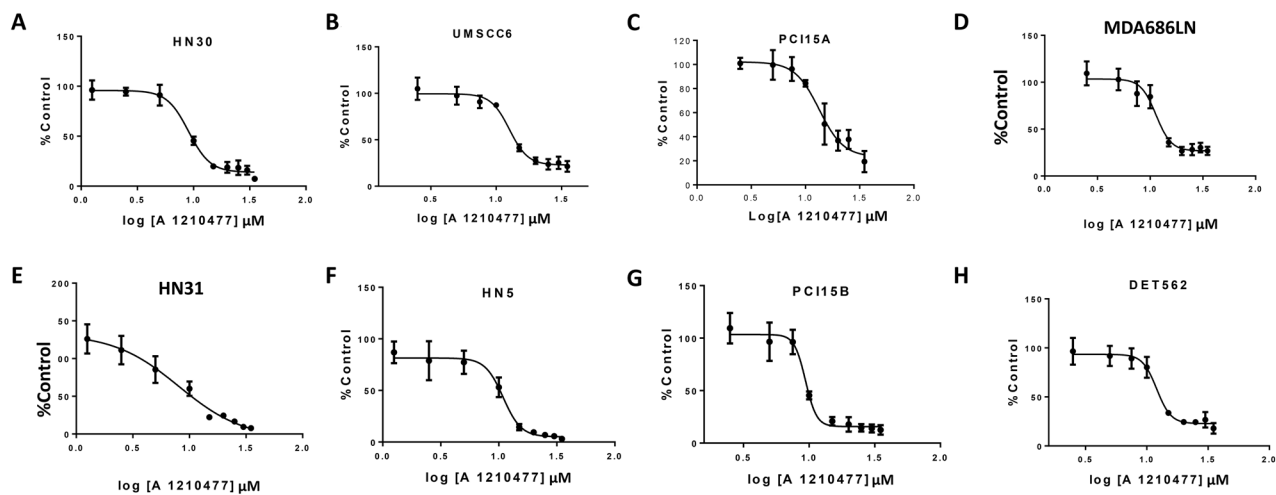

**Supplementary Figure 3: Representative results from MTT assays evaluating response of head and neck squamous cell cancer cell lines to A-1210477.** A-1210477 for (A) HN30, (B) UMSCC6, (C) PCI15A, (D) MDA686LN, (E) HN31, (F) HN5, (G) PCI15B, and (H) Detroit562.

**Supplementary Table 1: Annotated list of genes differentiating treatment-resistant from treatment-sensitive head and neck squamous carcinoma**

**See Supplementary File 1**

**Supplementary Table 2: Canonical pathways identified using Ingenuity Pathway analysis to evaluate 135 genes differentiating treatment-resistant from treatment-sensitive head and neck squamous cell carcinoma**

**See Supplementary File 2**
